# Supplementary material for: Comparison of Post-Transplantation Lymphoproliferative Disorder Risk and Prognostic Factors between Kidney and Liver Transplant Recipients
Source: MDPI journal article supplement (doi:10.3390/cancers14081953), 2022-04-13
Supplement: s1 [file s1]

| Location            | Number of patients |
|---------------------|--------------------|
| Lymph node          | 19                 |
| Bone marrow         | 12                 |
| Colon               | 5                  |
| Liver               | 6                  |
| Spleen              | 7                  |
| Tonsil              | 6                  |
| Lung                | 4                  |
| Small intestine     | 4                  |
| Kidney              | 3                  |
| Pancreas            | 1                  |
| Brain               | 1                  |
| Cerebrospinal fluid | 1                  |
| Skin                | 1                  |
| Calcaneus           | 1                  |
| Dissemination       | Number of patients |
| Focal (1 location)  | 21                 |
| 2 locations         | 10                 |
| 3 locations         | 5                  |
| 4 locations         | 0                  |
| 5 locations         | 2                  |
| 6 locations         | 1                  |

**Supplement Table S2.** PTLN location and dissemination in the SOT group (n=39).
