# Supplementary material for: Comparison of Post-Transplantation Lymphoproliferative Disorder Risk and Prognostic Factors between Kidney and Liver Transplant Recipients
Source: MDPI journal article supplement (doi:10.3390/cancers14081953), 2022-04-13
Supplement: s1 [file s1]

| Patient number | SOT type | IS regimen at PTLT diagnosis | Mean CsA concentration (ng/mL) | CsA duration (months) | Mean TAC concentration (ng/mL) | TAC duration (months) | Total MMF consumed (g) | Total AZA consumed (g) | Total GCS administered/ consumed (g of prednisone) | Number of IS conversions prior to PTLT | Time between last IS conversion and PTLT (months) |
|----------------|----------|------------------------------|--------------------------------|-----------------------|--------------------------------|-----------------------|------------------------|------------------------|----------------------------------------------------|----------------------------------------|---------------------------------------------------|
| 1              | KTX      | GCS+TAC+AZA                  | 0                              | 0                     | 11.71                          | 22.27                 | 0                      | 68.3                   | 13.13                                              | 0                                      | NA                                                |
| 2              | KTX      | GCS+TAC+MMF                  | 0                              | 0                     | 6.77                           | 117.9                 | 853                    | 0                      | 2.28                                               | 0                                      | NA                                                |
| 3              | KTX      | GCS+AZA                      | 183.26                         | 117.03                | 0                              | 0                     | 3646.5                 | 955.5                  | 61.65                                              | 5                                      | 4.23                                              |
| 4              | KTX      | TAC+AZA                      | 0                              | 0                     | 14.24                          | 64.6                  | 0                      | 196.8                  | 1.83                                               | 1                                      | 60.37                                             |
| 5              | KTX      | GCS+CsA+MMF                  | 168.81                         | 222.87                | 0                              | 0                     | 4867.76                | 402.7                  | 64.78                                              | 1                                      | 102.27                                            |
| 6              | KTX      | CsA+MMF                      | 92.24                          | 174.57                | 0                              | 0                     | 8961                   | 0                      | 9.8                                                | 1                                      | 121.9                                             |
| 7              | KTX      | GCS+MMF                      | 165.18                         | 19.9                  | 0                              | 0                     | 12352.5                | 25.05                  | 56.99                                              | 2                                      | 191.67                                            |
| 8              | KTX      | CsA+MMF                      | 139.97                         | 156                   | 0                              | 0                     | 7798                   | 81.7                   | 31.41                                              | 2                                      | 63.77                                             |
| 9              | KTX      | GCS+TAC+MMF                  | 0                              | 0                     | 14.35                          | 5.4                   | 237.6                  | 0                      | 2.54                                               | 0                                      | NA                                                |
| 10             | KTX      | GCS+CsA+MMF                  | 189.14                         | 40.4                  | 0                              | 0                     | 339                    | 81.45                  | 18.28                                              | 1                                      | 6.73                                              |
| 11             | KTX      | GCS+CsA+MMF                  | 138.21                         | 123.93                | NA                             | 2.5                   | 7710                   | 0                      | 20.36                                              | 1                                      | 123.93                                            |
| 12             | KTX      | GCS+TAC+MMF                  | 0                              | 0                     | 10.5                           | 37.67                 | 1147                   | 0                      | 5.25                                               | 0                                      | NA                                                |
| 13             | KTX      | GCS+CsA                      |                                |                       |                                |                       |                        |                        |                                                    |                                        |                                                   |
| 14             | KTX      | GCS+CsA+AZA                  |                                |                       |                                |                       |                        |                        |                                                    |                                        |                                                   |
| 15             | KTX      | GCS+TAC+AZA                  |                                |                       |                                |                       |                        |                        |                                                    |                                        |                                                   |
| 16             | KTX      | GCS+CsA+MMF                  |                                |                       |                                |                       |                        |                        |                                                    |                                        |                                                   |
| 17             | LTX      | GCS+TAC+MMF                  | 0                              | 0                     | 10.81                          | 10.93                 | 141                    | 0                      | 2.21                                               | 1                                      | 10.37                                             |
| 18             | LTX      | GCS+TAC                      | 0                              | 0                     | 19.08                          | 3.47                  | 0                      | 0                      | 1.03                                               | 0                                      | NA                                                |
| 19             | LTX      | GCS+CsA                      | 119.15                         | 2.43                  | 12.2                           | 24.6                  | 13                     | 0                      | 9.38                                               | 2                                      | 21.77                                             |
| 20             | LTX      | GCS+TAC+MMF                  | 0                              | 0                     | 8.8                            | 25.5                  | 534                    | 0                      | 6.27                                               | 0                                      | NA                                                |
| 21             | LTX      | GCS+TAC                      | 0                              | 0                     | 10.37                          | 36.7                  | 0                      | 0                      | 11.16                                              | 0                                      | NA                                                |
| 22             | LTX      | GCS+TAC                      | 0                              | 0                     | 12.06                          | 30.47                 | 128                    | 0                      | 14.35                                              | 1                                      | 26.27                                             |
| 23             | LTX      | TAC                          | 0                              | 0                     | 9.33                           | 60.5                  | 0                      | 0                      | 7.11                                               | 1                                      | 33.6                                              |
| 24             | LTX      | GCS+TAC+MMF                  | 0                              | 0                     | 9.86                           | 63.1                  | 1289.75                | 0                      | 17.65                                              | 0                                      | NA                                                |
| 25             | LTX      | GCS+TAC                      | 213.57                         | 6.87                  | 11.68                          | 82.73                 | 1231                   | 0                      | 28.32                                              | 2                                      | 44.07                                             |
| 26             | LTX      | TAC+MMF                      | 0                              | 0                     | 11.47                          | 70.63                 | 98                     | 0                      | 4.49                                               | 3                                      | 3.7                                               |
| 27             | LTX      | GCS+TAC+MMF                  | 0                              | 0                     | 6.91                           | 161.97                | 4927                   | 0                      | 24.56                                              | 0                                      | NA                                                |
| 28             | LTX      | TAC+MMF                      | 0                              | 0                     | 9.72                           | 45.03                 | 837                    | 0                      | 0                                                  | 0                                      | NA                                                |
| 29             | LTX      | TAC+MMF                      | 0                              | 0                     | 6.58                           | 134.53                | 3332.75                | 0                      | 16.35                                              | 3                                      | 21.2                                              |
| 30             | LTX      | GCS+TAC+AZA                  | 0                              | 0                     | 10.83                          | 71.83                 | 0                      | 51.15                  | 27.91                                              | 1                                      | 11.23                                             |
| 31             | LTX      | GCS+CsA                      | 157.08                         | 4.23                  | 9.9                            | 1.34                  | 0                      | 0                      | 2.19                                               | 1                                      | 4.23                                              |
| 32             | LTX      | TAC                          | 0                              | 0                     | 11.7                           | 37.23                 | 0                      | 0                      | 3.5                                                | 1                                      | 24.07                                             |
| 33             | LTX      | TAC                          | 0                              | 0                     | 13.57                          | 32.1                  | 0                      | 0                      | 9.38                                               | 1                                      | 10                                                |
| 34             | LTX      | GCS+TAC+MMF                  | 0                              | 0                     | 9.49                           | 7.53                  | 102                    | 0                      | 3.12                                               | 1                                      | 6.97                                              |
| 35             | LTX      | GCS+TAC                      | 0                              | 0                     | 12.79                          | 16.63                 | 0                      | 0                      | 4.7                                                | 0                                      | NA                                                |
| 36             | LTX      | TAC+MMF                      | 0                              | 0                     | 8.19                           | 53.7                  | 1765                   | 0                      | 0.77                                               | 1                                      | 43.73                                             |
| 37             | LTX      | TAC+MMF                      | 0                              | 0                     | 6.7                            | 68.53                 | 662                    | 0                      | 4.61                                               | 2                                      | 16.27                                             |
| 38             | LTX      | TAC                          |                                |                       |                                |                       |                        |                        |                                                    |                                        |                                                   |
| 39             | LTX      | GCS+TAC+MMF                  |                                |                       |                                |                       |                        |                        |                                                    |                                        |                                                   |

**Supplement Table S1. History of immunosuppressive treatment in our cohort of PTLT patients.** AZA- azathioprine, CsA – cyclosporin, GCS –glucocorticosteroids, KTX – kidney transplant, LTX – liver transplant, MMF – mycophenolate mofetil, SOT – solid organ transplant, TAC – tacrolimus, NA – not applicable. In four KTRs and two LTRs detailed data about IS conversions, dose modifications was unavailable due to missing or incomplete medical documentation (marked gray).
